# Supplementary material for: Analysis of IgM, IgA, and IgG Isotype Antibodies Directed Against SARS‑CoV‑2 Spike Glycoprotein and ORF8 in the Course of COVID‑19.
Source: Research Square preprint supplement (doi:10.21203/rs.3.rs-106292/v2), 2020-11-13
Supplement: Supplementary file 1 [file eb79a4628ae5294a6e1610c0.docx]

**Analysis of IgM, IgA, and IgG Isotype Antibodies Directed Against SARS‑CoV‑2 Spike Glycoprotein and ORF8 in the Course of COVID‑19.**

Denise Meinberger1, Manuel Koch2,3,4, Annika Roth1, Gabriele Hermes1, Jannik Stemler5, 6, 7, Oliver A. Cornely5,6,7, Thomas Streichert1, Andreas R. Klatt1.

Supplementary Information


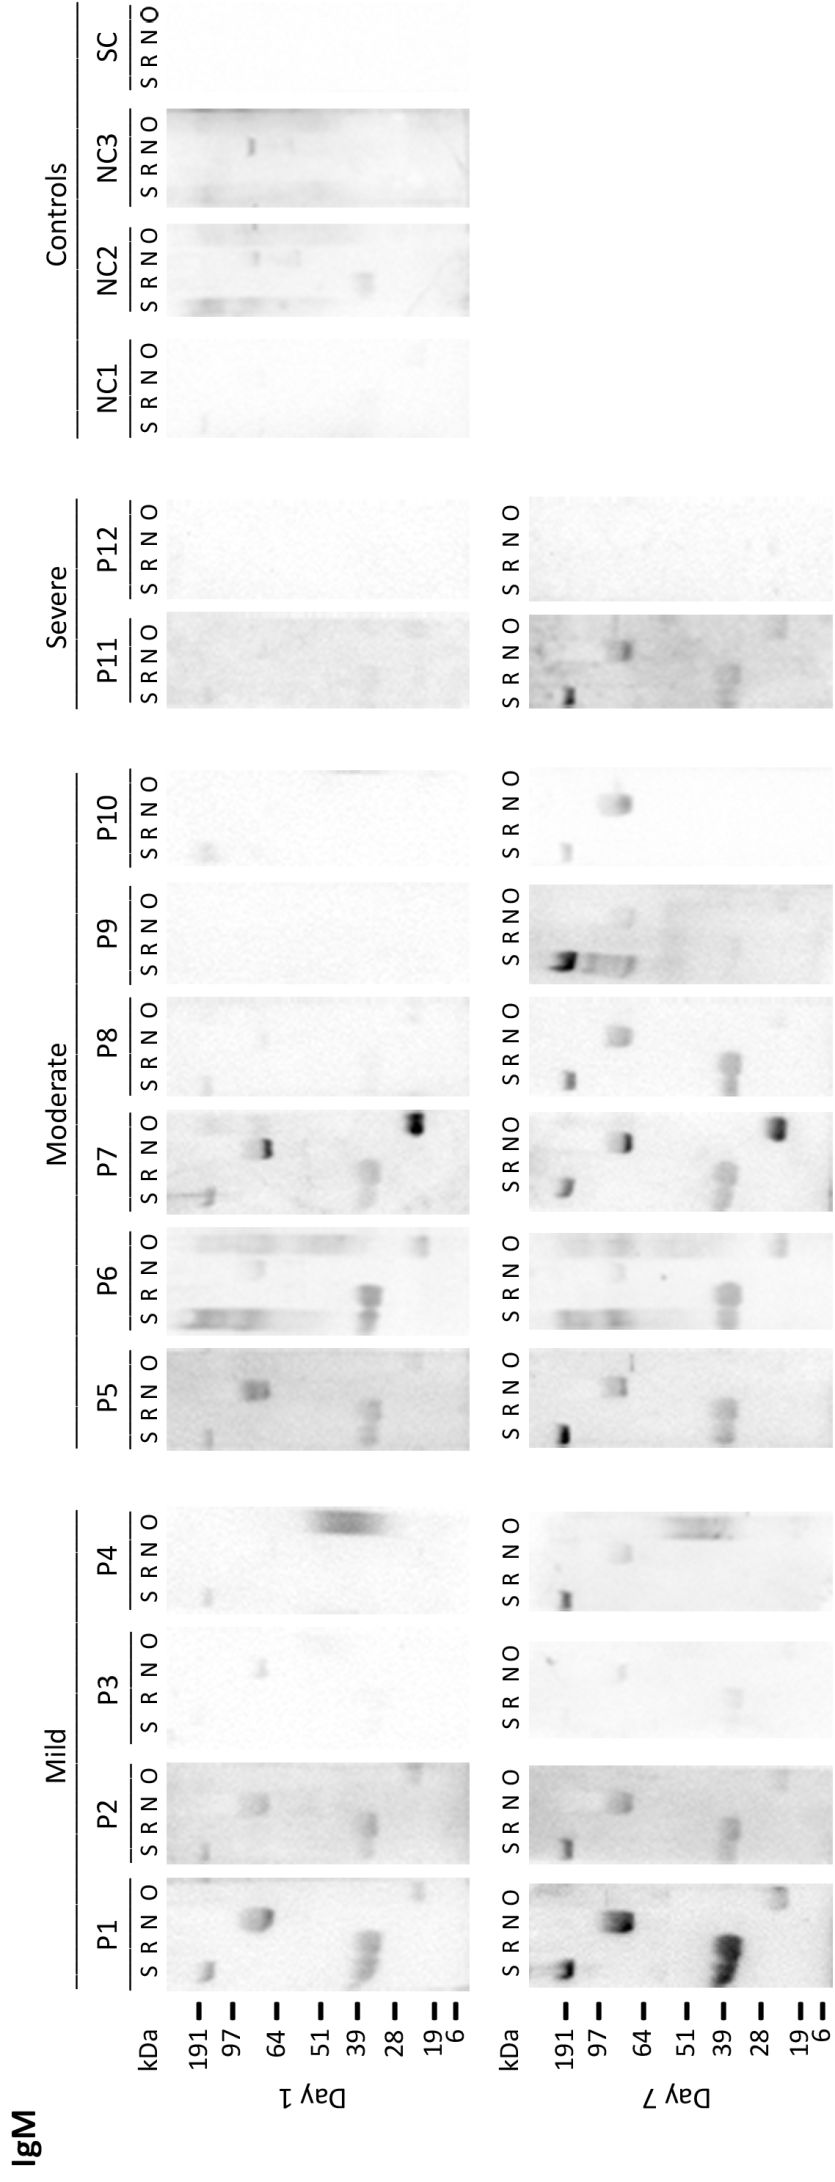


Supplementary Figure S1: Immunoblot analysis of anti‑SARS‑CoV‑2 IgM isotype antibodies.

Immunoblot with 2 µg of recombinant SARS‑CoV‑2 spike protein (S), the RBD of spike protein (R), the subunit 1 of the spike protein (S1), and ORF8 protein (O) incubated with patient´s serum and detected with an anti‑human IgM HRP‑conjugated antibody. Cropped lanes of different immunoblots are divided by white space. Immunoblots were only cut in width and lanes are shown in their-full length. All immunoblots are displayed with the same exposure time.


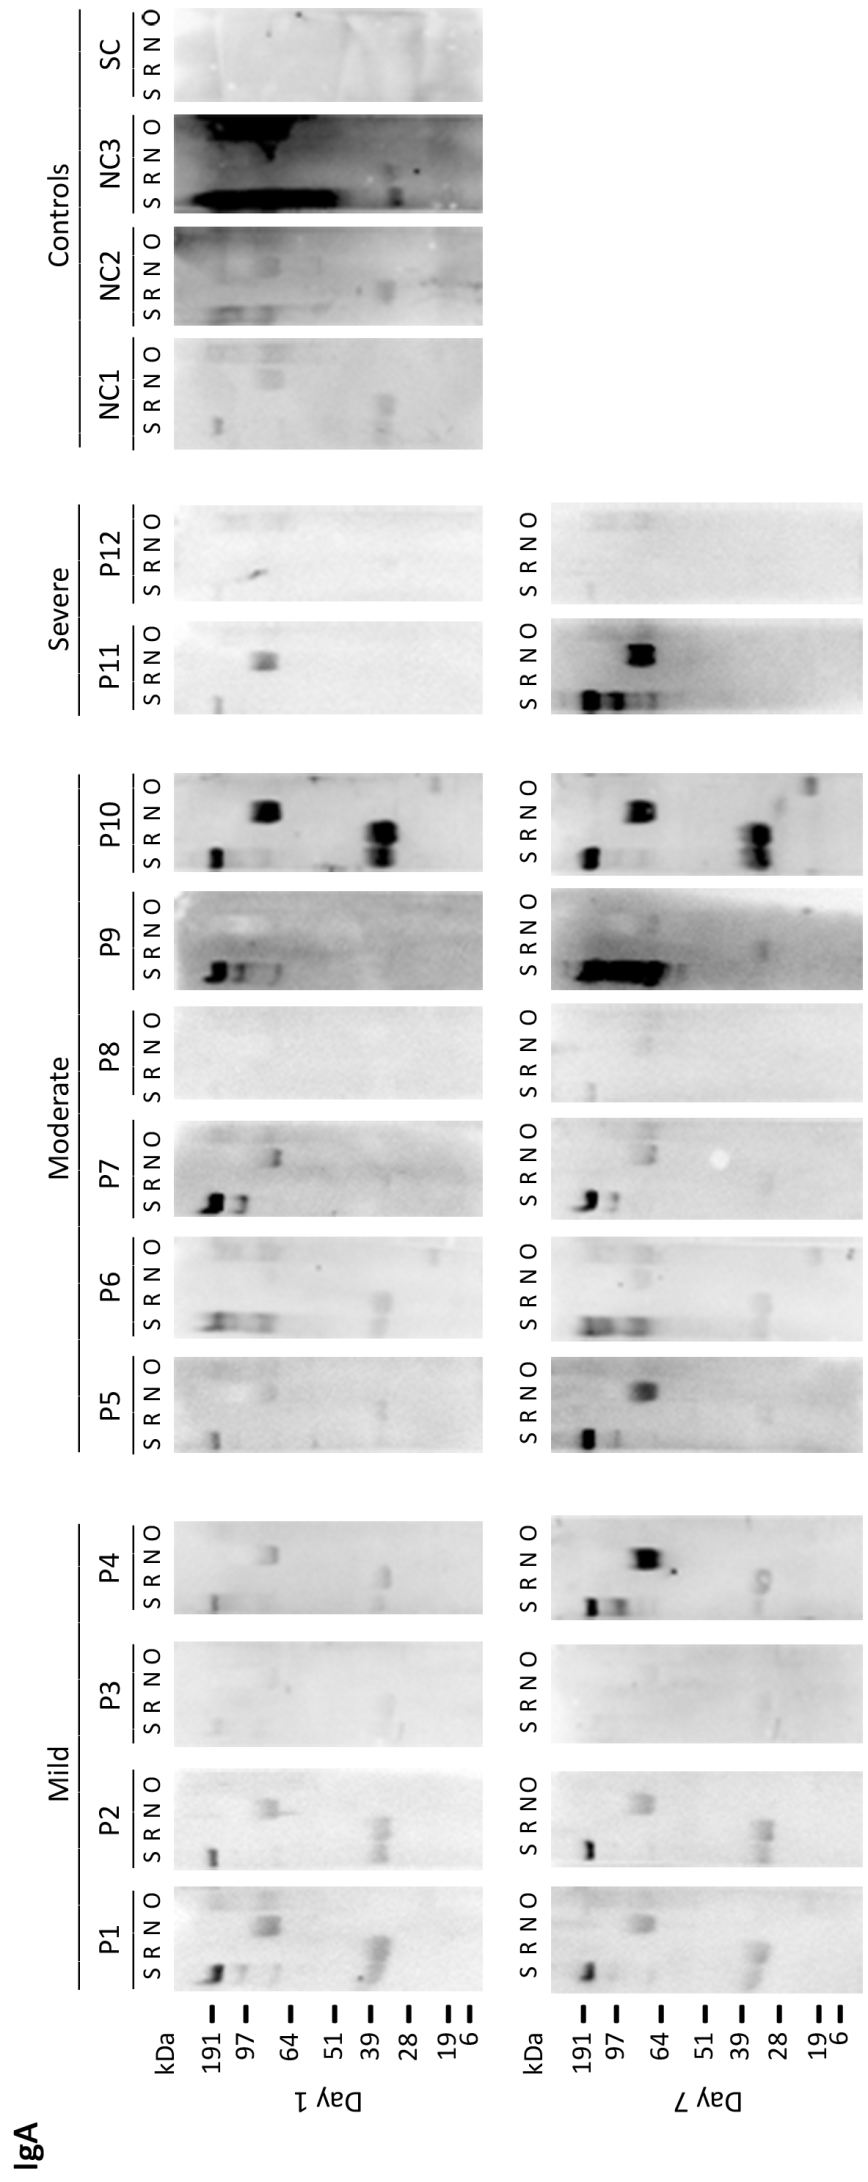


Supplementary Figure S2: Immunoblot analysis of anti‑SARS‑CoV‑2 IgA isotype antibodies.

Immunoblot with 2 µg of recombinant SARS‑CoV‑2 spike protein (S), the RBD of spike protein (R), the subunit 1 of the spike protein (S1), and ORF8 protein (O) incubated with patient´s serum and detected with an anti‑human IgA HRP‑conjugated antibody. Cropped lanes of different immunoblots are divided by white space. Immunoblots were only cut in width and lanes are shown in their full-length. All immunoblots are displayed with the same exposure time.


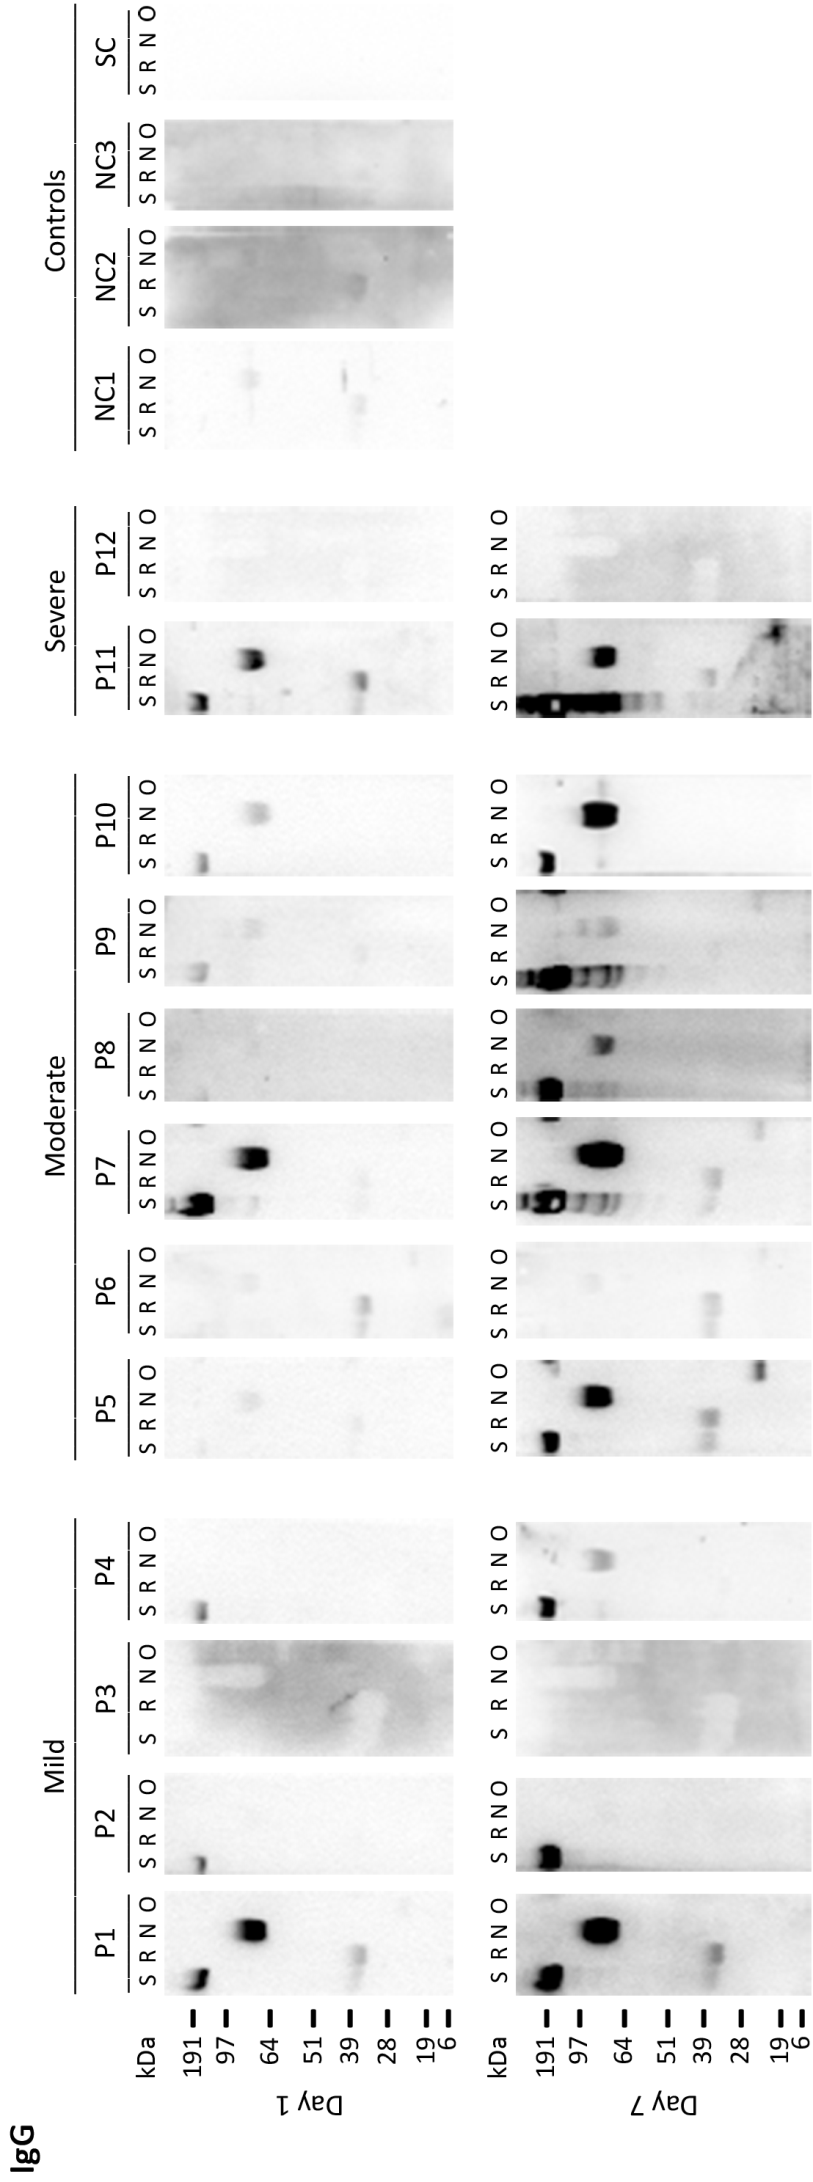


Supplementary Figure S3: Immunoblot analysis of anti‑SARS‑CoV‑2 IgG isotype antibodies.

Immunoblot with 2 µg of recombinant SARS‑CoV‑2 spike protein (S), the RBD of spike protein (R), the subunit 1 of the spike protein (S1), and ORF8 protein (O) incubated with patient´s serum and detected with an anti‑human IgG HRP‑conjugated antibody. Cropped lanes of different immunoblots are divided by white space. Immunoblots were only cut in width and lanes are shown in their full-length. All immunoblots are displayed with the same exposure time.
